# Supplementary material
Source: PubMed Central journal article supplement (PMC4097617)
Supplement: IAI.01765-14_zii999090747so1.pdf [file IAI.01765-14_zii999090747so1.pdf]

**Table S1.** The complete list of differentially expressed genes of the  $\Delta$ rfbE mutant by microarray analysis

| <b>Gene locus tag of<br/><i>B. abortus</i> 9-941</b> | <b>Fold<br/>Change</b> | <b>Regulation</b> | <b>Gene</b> | <b>Product</b>                                              |
|------------------------------------------------------|------------------------|-------------------|-------------|-------------------------------------------------------------|
| BruAb1_2112                                          | 2.12                   | up                |             | hypothetical protein                                        |
| BruAb1_1176                                          | 2.71                   | up                | <i>clpS</i> | ATP-dependent Clp protease adaptor protein ClpS             |
| BruAb2_0850                                          | 3.61                   | up                |             | hypothetical protein                                        |
| BruAb1_0233                                          | 2.03                   | up                |             | sugar ABC transporter, ATP-binding protein                  |
| BruAb2_0838                                          | 2.57                   | up                |             | hypothetical protein                                        |
| BruAb1_1735                                          | 8.15                   | up                |             | hypothetical protein                                        |
| BruAb1_1650                                          | 3.23                   | up                |             | hypothetical protein                                        |
| BruAb2_0969                                          | 2.10                   | up                |             |                                                             |
| BruAb1_0815                                          | 2.52                   | up                |             | hypothetical protein                                        |
| BruAb1_1772                                          | 2.29                   | up                |             | branched-chain amino acid ABC transporter, permease protein |
| BruAb2_0501                                          | 3.67                   | up                |             | transcriptional regulator                                   |
| BruAb1_1471                                          | 4.52                   | up                |             | hypothetical protein                                        |
| BruAb1_trna_0003                                     | 2.89                   | up                |             | tRNA-Phe                                                    |
| BruAb1_1375                                          | 3.57                   | up                |             | hypothetical protein                                        |
| BruAb1_0622                                          | 2.56                   | up                |             | hypothetical protein                                        |
| BruAb1_1975                                          | 2.09                   | up                |             | hypothetical protein                                        |
| BruAb2_1013                                          | 2.02                   | up                |             |                                                             |
| BruAb2_1055                                          | 9.07                   | up                |             | IS3 family transposase orfB                                 |
| BruAb1_1643                                          | 2.40                   | up                |             | hypothetical protein                                        |
| BruAb1_0445                                          | 2.65                   | up                |             | cold-shock family protein                                   |
| BruAb2_0799                                          | 3.38                   | up                |             | oxidoreductase                                              |
| BruAb1_trna_0008                                     | 2.00                   | up                |             | tRNA-Pro                                                    |
| BruAb2_0954                                          | 2.02                   | up                |             | aldehyde dehydrogenase family protein                       |

|                  |      |    |              |                                                                                 |
|------------------|------|----|--------------|---------------------------------------------------------------------------------|
| BruAb1_1321      | 2.57 | up |              | hypothetical protein                                                            |
| BruAb1_trna_0002 | 7.06 | up |              | tRNA-Pro                                                                        |
| BruAb1_trna_0009 | 4.34 | up |              | tRNA-Arg                                                                        |
| BruAb1_1651      | 2.45 | up |              | hypothetical protein                                                            |
| BruAb2_0304      | 2.62 | up | <i>hutI</i>  | imidazolonepropionase                                                           |
| BruAb2_0393      | 3.36 | up |              | hypothetical protein                                                            |
| BruAb1_1506      | 2.13 | up |              | cold-shock family protein                                                       |
| BruAb2_0311      | 2.46 | up |              | alanine catabolic operon transcriptional regulator                              |
| BruAb2_0280      | 2.66 | up |              | branched-chain amino acid ABC transporter periplasmic substrate-binding protein |
| BruAb2_0291      | 2.24 | up |              | hypothetical protein                                                            |
| BruAb2_1087      | 2.09 | up | <i>xylF</i>  | XylF, D-xylose ABC transporter, periplasmic D-xylose-binding protein            |
| BruAb1_1281      | 2.28 | up |              | hypothetical protein                                                            |
| BruAb1_0556      | 2.67 | up |              | transposase orfA                                                                |
| BruAb2_0394      | 3.01 | up |              | hypothetical protein                                                            |
| BruAb2_0191      | 2.58 | up | <i>groES</i> | co-chaperonin GroES                                                             |
| BruAb1_0940      | 2.42 | up |              | cysteine desulfurase activator complex subunit SufB                             |
| BruAb1_1726      | 6.20 | up |              | hypothetical protein                                                            |
| BruAb1_0035      | 6.94 | up |              | hypothetical protein                                                            |
| BruAb2_trna_0010 | 2.31 | up |              | tRNA-Leu                                                                        |
| BruAb1_1516      | 2.22 | up |              | hypothetical protein                                                            |
| BruAb2_0587      | 4.32 | up |              | transcriptional regulator PcaR                                                  |
| BruAb1_2005      | 2.16 | up |              | hypothetical protein                                                            |
| BruAb1_0011      | 2.09 | up |              | hypothetical protein                                                            |
| BruAb1_0590      | 2.38 | up | <i>ptrB</i>  | PtrB, protease                                                                  |
| BruAb1_trna_0023 | 2.51 | up |              | tRNA-Tyr                                                                        |
| BruAb1_0158      | 2.12 | up |              | hypothetical protein                                                            |

|                  |      |    |             |                                                                                 |
|------------------|------|----|-------------|---------------------------------------------------------------------------------|
| BruAb1_1808      | 2.17 | up |             |                                                                                 |
| BruAb1_trna_0033 | 2.77 | up |             | tRNA-Ile                                                                        |
| BruAb2_0880      | 2.14 | up | <i>ptrB</i> | transcriptional activator FtrB                                                  |
| BruAb1_0507      | 2.36 | up |             | hypothetical protein                                                            |
| BruAb1_0455      | 3.42 | up |             | transglycosylase-associated protein                                             |
| BruAb1_0148      | 2.62 | up |             | hypothetical protein                                                            |
| BruAb2_0592      | 2.03 | up |             |                                                                                 |
| BruAb1_1334      | 5.58 | up |             | acid-shock protein                                                              |
| BruAb1_0748      | 2.91 | up |             | hypothetical protein                                                            |
| BruAb1_1280      | 3.94 | up |             | hypothetical protein                                                            |
| BruAb2_0682      | 2.52 | up |             | hypothetical protein                                                            |
| BruAb1_2016      | 2.76 | up |             | hypothetical protein                                                            |
| BruAb1_0230      | 4.06 | up |             | sugar ABC transporter, periplasmic sugar-binding protein                        |
| BruAb1_1185      | 2.10 | up |             | transcriptional regulator                                                       |
| BruAb1_1767      | 2.06 | up |             | branched-chain amino acid ABC transporter periplasmic substrate-binding protein |
| BruAb1_0004      | 4.24 | up | <i>moeB</i> | molybdopterin biosynthesis protein MoeB                                         |
| BruAb2_0788      | 3.48 | up |             | hypothetical protein                                                            |
| BruAb1_1793      | 2.70 | up | <i>htpX</i> | heat shock protein HtpX                                                         |
| BruAb1_1662      | 3.87 | up |             | hypothetical protein                                                            |
| BruAb1_0693      | 3.99 | up |             | hypothetical protein                                                            |
| BruAb2_0486      | 3.41 | up |             | short chain dehydrogenase/reductase family oxidoreductase                       |
| BruAb2_0665      | 2.44 | up |             | transposase orfA ISBm1, interruption-N                                          |
| BruAb1_1507      | 3.59 | up |             | hypothetical protein                                                            |
| BruAb1_1468      | 2.45 | up |             | hypothetical protein                                                            |
| BruAb2_0671      | 3.26 | up |             |                                                                                 |
| BruAb2_1049      | 2.85 | up |             | L-fucose phosphate aldolase                                                     |

|                  |      |    |             |                                            |
|------------------|------|----|-------------|--------------------------------------------|
| BruAb2_0503      | 2.52 | up |             | hypothetical protein                       |
| BruAb1_1556      | 5.13 | up |             | hypothetical protein                       |
| BruAb2_0236      | 2.31 | up |             | hypothetical protein                       |
| BruAb1_1560      | 2.41 | up |             |                                            |
| BruAb1_1390      | 2.01 | up |             | hypothetical protein                       |
| BruAb1_trna_0017 | 3.22 | up |             | tRNA-Gly                                   |
| BruAb1_0546      | 2.51 | up |             | ISBm1, transposase orfA                    |
| BruAb1_1632      | 2.42 | up |             | hypothetical protein                       |
| BruAb2_0445      | 2.26 | up |             | hypothetical protein                       |
| BruAb2_0608      | 2.22 | up |             | hypothetical protein                       |
| BruAb1_1384      | 2.34 | up | <i>ilvH</i> | acetolactate synthase 3 regulatory subunit |
| BruAb2_1081      | 2.11 | up | <i>motB</i> | flagellar motor protein MotB               |
| BruAb1_trna_0012 | 2.91 | up |             | tRNA-Asp                                   |
| BruAb1_1268      | 2.17 | up |             | cold-shock family protein                  |
| BruAb1_0895      | 2.07 | up |             | sec-independent translocase                |
| BruAb2_0259      | 2.08 | up |             | hypothetical protein                       |
| BruAb1_trna_0022 | 4.01 | up |             | tRNA-Gly                                   |
| BruAb1_0886      | 2.92 | up |             | hypothetical protein                       |
| BruAb1_1329      | 2.84 | up |             | permease                                   |
| BruAb1_1943      | 2.53 | up |             |                                            |
| BruAb1_1170      | 2.67 | up |             | hypothetical protein                       |
| BruAb2_0035      | 2.46 | up |             |                                            |
| BruAb1_trna_0014 | 3.03 | up |             | tRNA-Thr                                   |
| BruAb1_0562      | 2.11 | up | <i>manA</i> | ManA, mannose-6-phosphate isomerase        |
| BruAb1_0449      | 2.61 | up |             | hypothetical protein                       |
| BruAb2_1070      | 2.02 | up | <i>fliQ</i> | flagellar biosynthesis protein FliQ        |

|             |       |      |             |                                                               |
|-------------|-------|------|-------------|---------------------------------------------------------------|
| BruAb1_0232 | 2.65  | up   |             | sugar ABC transporter, permease protein                       |
| BruAb2_0400 | 5.42  | up   |             | hypothetical protein                                          |
| BruAb1_1313 | 2.78  | up   |             | hypothetical protein                                          |
| BruAb2_0811 | 5.19  | up   |             | hypothetical protein                                          |
| BruAb1_2068 | 3.22  | up   |             | hypothetical protein                                          |
| BruAb1_0989 | 2.23  | up   |             | hypothetical protein                                          |
| BruAb1_0510 | 2.90  | up   |             | hypothetical protein                                          |
| BruAb1_0182 | 2.14  | up   |             | hypothetical protein                                          |
| BruAb1_0962 | 3.03  | up   | <i>mobB</i> |                                                               |
| BruAb1_1817 | 3.17  | up   |             | hypothetical protein                                          |
| BruAb1_0462 | 3.43  | up   |             | hypothetical protein                                          |
| BruAb1_1331 | 2.04  | up   |             | hypothetical protein                                          |
| BruAb2_0459 | 2.08  | up   |             | AsnC family transcriptional regulator                         |
| BruAb2_0781 | 2.11  | down |             | hypothetical protein                                          |
| BruAb1_1781 | 2.06  | down | <i>atpA</i> | F0F1 ATP synthase subunit alpha                               |
| BruAb1_0512 | 2.37  | down |             | voltage gated chloride channel family protein                 |
| BruAb1_0937 | 2.03  | down | <i>qacH</i> | QacH, quaternary ammonium compound-resistance protein         |
| BruAb2_0278 | 2.55  | down |             | branched-chain amino acid ABC transporter ATP-binding protein |
| BruAb1_0116 | 2.01  | down |             | hypothetical protein                                          |
| BruAb1_0217 | 2.17  | down |             | ABC transporter, permease protein                             |
| BruAb2_0267 | 3.64  | down | <i>rpsU</i> | 30S ribosomal protein S21                                     |
| BruAb1_0542 | 15.70 | down | <i>rfbE</i> | RfbE, O-antigen export system ATP-binding protein RfbE        |
| BruAb1_0415 | 2.61  | down |             | hypothetical protein                                          |
| BruAb1_1551 | 2.97  | down |             | hypothetical protein                                          |
| BruAb1_1239 | 5.24  | down | <i>rpsJ</i> | 30S ribosomal protein S10                                     |
| BruAb1_0820 | 3.06  | down | <i>nuoE</i> | NADH dehydrogenase subunit E                                  |

|             |      |      |             |                                                           |
|-------------|------|------|-------------|-----------------------------------------------------------|
| BruAb1_1803 | 2.03 | down | <i>rpsP</i> | 30S ribosomal protein S16                                 |
| BruAb2_0794 | 2.30 | down |             | peptide ABC transporter, permease protein                 |
| BruAb1_1350 | 3.94 | down |             | hypothetical protein                                      |
| BruAb1_1865 | 2.86 | down | <i>gcp</i>  | putative DNA-binding/iron metalloprotein/AP endonuclease  |
| BruAb1_0002 | 2.13 | down | <i>dnaN</i> | DNA polymerase III subunit beta                           |
| BruAb1_1238 | 5.08 | down | <i>rplC</i> | 50S ribosomal protein L3                                  |
| BruAb2_0167 | 2.01 | down |             | hypothetical protein                                      |
| BruAb2_0688 | 2.29 | down |             | ABC transporter, ATP-binding protein                      |
| BruAb1_0274 | 2.37 | down |             | hypothetical protein                                      |
| BruAb1_0740 | 2.26 | down |             | exonuclease                                               |
| BruAb1_1901 | 3.75 | down | <i>sucD</i> | succinyl-CoA synthetase subunit alpha                     |
| BruAb1_1883 | 2.10 | down | <i>rplS</i> | 50S ribosomal protein L19                                 |
| BruAb2_0505 | 4.66 | down | <i>gcvH</i> | glycine cleavage system protein H                         |
| BruAb1_1606 | 2.15 | down |             |                                                           |
| BruAb1_1899 | 2.83 | down | <i>sucA</i> | 2-oxoglutarate dehydrogenase E1 component                 |
| BruAb1_0650 | 2.57 | down |             | hypothetical protein                                      |
| BruAb1_0934 | 2.64 | down |             | hypothetical protein                                      |
| BruAb1_2158 | 2.03 | down | <i>rpsT</i> | 30S ribosomal protein S20                                 |
| BruAb1_1236 | 3.58 | down | <i>rplW</i> | 50S ribosomal protein L23                                 |
| BruAb1_0822 | 3.33 | down | <i>nuoG</i> | NADH dehydrogenase subunit G                              |
| BruAb1_0511 | 2.22 | down |             | HAD superfamily hydrolase                                 |
| BruAb1_0572 | 2.32 | down |             |                                                           |
| BruAb1_0474 | 2.11 | down | <i>rplI</i> | 50S ribosomal protein L9                                  |
| BruAb2_0019 | 2.14 | down |             | HupC/HyaC/HydC family protein                             |
| BruAb2_0699 | 2.31 | down |             | 2-oxoisovalerate dehydrogenase E1 component, beta subunit |
| BruAb1_0483 | 3.53 | down | <i>fabF</i> | 3-oxoacyl-(acyl carrier protein) synthase II              |

|                  |       |      |             |                                                |
|------------------|-------|------|-------------|------------------------------------------------|
| BruAb1_1237      | 4.13  | down | <i>rplD</i> | 50S ribosomal protein L4                       |
| BruAb1_1780      | 2.31  | down | <i>atpG</i> | FOF1 ATP synthase subunit gamma                |
| BruAb1_0413      | 2.40  | down |             | hypothetical protein                           |
| BruAb1_0209      | 2.53  | down | <i>thiE</i> | thiamine-phosphate pyrophosphorylase           |
| BruAb1_2023      | 2.18  | down |             | Gfo/Idh/MocA family oxidoreductase             |
| BruAb1_0352      | 3.18  | down |             | hypothetical protein                           |
| BruAb1_2072      | 2.19  | down | <i>ahcY</i> | S-adenosyl-L-homocysteine hydrolase            |
| BruAb1_0927      | 2.47  | down |             | peptide chain release factor 2                 |
| BruAb1_1919      | 2.07  | down |             | peptidyl-prolyl cis-trans isomerase            |
| BruAb1_0077      | 3.67  | down |             | hypothetical protein                           |
| BruAb2_0576      | 2.08  | down |             |                                                |
| BruAb1_0898      | 2.03  | down | <i>surE</i> | stationary phase survival protein SurE         |
| BruAb1_0409      | 2.68  | down |             | FOF1 ATP synthase subunit B'                   |
| BruAb1_0977      | 2.75  | down |             |                                                |
| BruAb1_1241      | 8.22  | down | <i>fusA</i> | elongation factor G                            |
| BruAb1_1445      | 2.99  | down | <i>metF</i> | MetF, 5,10-methylenetetrahydrofolate reductase |
| BruAb1_1924      | 2.02  | down |             |                                                |
| BruAb1_2095      | 2.64  | down | <i>rplT</i> | 50S ribosomal protein L20                      |
| BruAb2_0846      | 2.95  | down |             | HlyD family secretion protein                  |
| BruAb1_1903      | 2.31  | down | <i>mdh</i>  | malate dehydrogenase                           |
| BruAb2_0549      | 2.36  | down |             | hypothetical protein                           |
| BruAb1_0476      | 4.11  | down | <i>rpsR</i> | 30S ribosomal protein S18                      |
| BruAb2_0816      | 2.55  | down | <i>xfp</i>  | putative phosphoketolase                       |
| BruAb1_1251      | 2.59  | down | <i>rplA</i> | 50S ribosomal protein L1                       |
| BruAb1_1235      | 2.57  | down | <i>rplB</i> | 50S ribosomal protein L2                       |
| BruAb2_rrna_0002 | 18.35 | down |             | 23S ribosomal RNA                              |

|                  |      |      |               |                                                            |
|------------------|------|------|---------------|------------------------------------------------------------|
| BruAb1_1701      | 2.39 | down | <i>rpmE</i>   | 50S ribosomal protein L31                                  |
| BruAb1_0364      | 2.52 | down |               | hypothetical protein                                       |
| BruAb2_0698      | 3.14 | down |               | branched-chain alpha-keto acid dehydrogenase subunit E2    |
| BruAb1_0968      | 2.55 | down |               |                                                            |
| BruAb1_1227      | 2.22 | down | <i>rplX</i>   | 50S ribosomal protein L24                                  |
| BruAb1_0320      | 2.10 | down |               | hypothetical protein                                       |
| BruAb1_1167      | 2.12 | down | <i>tsf</i>    | elongation factor Ts                                       |
| BruAb2_0700      | 2.39 | down |               | 2-oxoisovalerate dehydrogenase E1 component, alpha subunit |
| BruAb2_0263      | 2.04 | down |               | oxidoreductase                                             |
| BruAb1_0843      | 2.51 | down | <i>rpsD</i>   | 30S ribosomal protein S4                                   |
| BruAb2_0960      | 2.21 | down |               | hypothetical protein                                       |
| BruAb1_1730      | 2.11 | down | <i>purK</i>   | phosphoribosylaminoimidazole carboxylase ATPase subunit    |
| BruAb1_0805      | 3.55 | down | <i>rplM</i>   | 50S ribosomal protein L13                                  |
| BruAb1_0668      | 2.17 | down | <i>rpoZ</i>   | DNA-directed RNA polymerase subunit omega                  |
| BruAb1_1744      | 2.48 | down |               | thiamine ABC transporter ATP-binding protein               |
| BruAb1_0389      | 2.52 | down | <i>ccoN</i>   | cbb3-type cytochrome c oxidase subunit I                   |
| BruAb1_1132      | 2.17 | down | <i>lpdA-1</i> | dihydrolipoamide dehydrogenase                             |
| BruAb1_0049      | 2.15 | down |               | hypothetical protein                                       |
| BruAb1_1527      | 2.15 | down |               | maoC-related protein                                       |
| BruAb1_2094      | 2.03 | down | <i>rpmI</i>   | 50S ribosomal protein L35                                  |
| BruAb1_trna_0005 | 2.40 | down |               | tRNA-Arg                                                   |
| BruAb1_0624      | 2.04 | down |               | sensor histidine kinase                                    |
| BruAb1_0155      | 2.67 | down |               | hypothetical protein                                       |
| BruAb2_0962      | 3.24 | down | <i>rnpA</i>   | ribonuclease P                                             |
| BruAb1_0351      | 3.10 | down |               | hypothetical protein                                       |
| BruAb1_1508      | 2.79 | down |               | metallo-beta-lactamase family protein                      |



|                  |       |      |             |                                                        |
|------------------|-------|------|-------------|--------------------------------------------------------|
| BruAb1_0388      | 4.29  | down | <i>ccoO</i> | cbb3-type cytochrome c oxidase subunit II              |
| BruAb1_0062      | 2.14  | down | <i>frcK</i> | putative fructose transport system kinase              |
| BruAb1_0571      | 2.10  | down |             | transcriptional regulator                              |
| BruAb1_1234      | 2.29  | down | <i>rpsS</i> | 30S ribosomal protein S19                              |
| BruAb1_0208      | 2.19  | down |             | ABC transporter, periplasmic substrate-binding protein |
| BruAb2_1069      | 2.05  | down |             |                                                        |
| BruAb1_1242      | 6.66  | down | <i>rpsG</i> | 30S ribosomal protein S7                               |
| BruAb1_0702      | 2.18  | down | <i>pdxA</i> | 4-hydroxythreonine-4-phosphate dehydrogenase           |
| BruAb1_1096      | 2.27  | down |             | TetR family transcriptional regulator                  |
| BruAb1_1829      | 2.98  | down | <i>rplU</i> | 50S ribosomal protein L21                              |
| BruAb1_0833      | 2.07  | down |             | hypothetical protein                                   |
| BruAb1_1522      | 2.28  | down | <i>prsA</i> | ribose-phosphate pyrophosphokinase                     |
| BruAb1_0586      | 2.85  | down |             | hypothetical protein                                   |
| BruAb1_1360      | 2.09  | down |             | urea transporter                                       |
| BruAb2_0506      | 2.44  | down | <i>gcvP</i> | glycine dehydrogenase                                  |
| BruAb1_0935      | 2.12  | down | <i>tyrS</i> | tyrosyl-tRNA synthetase                                |
| BruAb2_0971      | 2.02  | down | <i>dapE</i> | succinyl-diaminopimelate desuccinylase                 |
| BruAb1_1285      | 2.09  | down |             | hypothetical protein                                   |
| BruAb1_rrna_0002 | 19.31 | down |             | 23S ribosomal RNA                                      |
| BruAb1_1219      | 2.02  | down | <i>rplO</i> | 50S ribosomal protein L15                              |
| BruAb1_1990      | 2.07  | down | <i>rpmB</i> | 50S ribosomal protein L28                              |
| BruAb1_0656      | 2.10  | down |             | hypothetical protein                                   |
| BruAb1_trna_0010 | 2.36  | down |             | tRNA-Pro                                               |
| BruAb2_0938      | 2.01  | down |             | hypothetical protein                                   |
| BruAb1_1233      | 2.60  | down | <i>rplV</i> | 50S ribosomal protein L22                              |
| BruAb2_0379      | 2.18  | down |             | epimerase/dehydratase family protein                   |

|                  |       |      |             |                                                                                              |
|------------------|-------|------|-------------|----------------------------------------------------------------------------------------------|
| BruAb1_1921      | 2.30  | down | <i>secA</i> | preprotein translocase subunit SecA                                                          |
| BruAb1_rrna_0003 | 22.37 | down |             | 16S ribosomal RNA                                                                            |
| BruAb2_0712      | 2.01  | down | <i>cydA</i> | CydA, cytochrome d ubiquinol oxidase, subunit I                                              |
| BruAb1_0560      | 2.41  | down |             | phosphomannomutase                                                                           |
| BruAb1_1677      | 2.26  | down |             | hypothetical protein                                                                         |
| BruAb1_1624      | 2.01  | down |             | GMC family oxidoreductase                                                                    |
| BruAb1_0408      | 2.17  | down | <i>atpE</i> | F0F1 ATP synthase subunit C                                                                  |
| BruAb1_0160      | 2.28  | down |             | hypothetical protein                                                                         |
| BruAb1_1142      | 3.18  | down |             | hypothetical protein                                                                         |
| BruAb1_1535      | 2.47  | down |             | RNA methyltransferase                                                                        |
| BruAb1_1524      | 2.43  | down |             | 50S ribosomal protein L25/general stress protein Ctc                                         |
| BruAb2_0617      | 2.38  | down |             | MutT/nudix family protein                                                                    |
| BruAb1_2136      | 2.37  | down | <i>nusA</i> | transcription elongation factor NusA                                                         |
| BruAb1_1214      | 2.34  | down | <i>rpoA</i> | DNA-directed RNA polymerase subunit alpha                                                    |
| BruAb1_1158      | 2.38  | down | <i>fabZ</i> | (3R)-hydroxymyristoyl-ACP dehydratase                                                        |
| BruAb1_1779      | 3.10  | down | <i>atpD</i> | F0F1 ATP synthase subunit beta                                                               |
| BruAb1_1842      | 2.52  | down |             | hypothetical protein                                                                         |
| BruAb1_0854      | 2.10  | down |             | phosphoribosylformylglycinamide synthase subunit PurS                                        |
| BruAb2_0473      | 2.29  | down |             | hypothetical protein                                                                         |
| BruAb1_trna_0006 | 2.64  | down |             | tRNA-Gln                                                                                     |
| BruAb1_0315      | 2.19  | down | <i>fadD</i> | Long-chain-fatty-acid--CoA ligase                                                            |
| BruAb1_1878      | 3.27  | down | <i>sdhA</i> | succinate dehydrogenase flavoprotein subunit                                                 |
| BruAb2_0961      | 2.05  | down | <i>rpmH</i> | 50S ribosomal protein L34                                                                    |
| BruAb2_0571      | 2.37  | down | <i>ugpB</i> | UgbB, glycerol-3-phosphate ABC transporter, periplasmic glycerol-3-phosphate-binding protein |
| BruAb2_0736      | 2.86  | down |             |                                                                                              |
| BruAb2_0865      | 2.26  | down | <i>nrdE</i> | ribonucleotide-diphosphate reductase subunit alpha                                           |

|                  |      |      |              |                                                              |
|------------------|------|------|--------------|--------------------------------------------------------------|
| BruAb1_1444      | 2.62 | down |              | transporter                                                  |
| BruAb1_0701      | 2.50 | down | <i>ksgA</i>  | dimethyladenosine transferase                                |
| BruAb1_1421      | 2.11 | down | <i>ftsA</i>  | FtsA, cell division protein FtsA                             |
| BruAb1_1898      | 2.27 | down | <i>sucB</i>  | dihydrolipoamide succinyltransferase                         |
| BruAb1_1754      | 2.06 | down |              | ATP-dependent helicase                                       |
| BruAb1_trna_0026 | 3.93 | down |              | tRNA-Lys                                                     |
| BruAb1_1248      | 2.57 | down | <i>rpoB</i>  | DNA-directed RNA polymerase subunit beta                     |
| BruAb1_0399      | 2.22 | down |              | hypothetical protein                                         |
| BruAb1_1255      | 3.99 | down | <i>tuf</i>   | elongation factor Tu                                         |
| BruAb1_0720      | 2.30 | down |              | outer-membrane protein, 25 kDa                               |
| BruAb2_0767      | 2.80 | down |              | hypothetical protein                                         |
| BruAb1_0657      | 3.43 | down | <i>omp2b</i> | Omp2b, porin                                                 |
| BruAb1_1914      | 2.59 | down |              | hypothetical protein                                         |
| BruAb2_0569      | 2.06 | down | <i>ugpE</i>  | UgpE, glycerol-3-phosphate ABC transporter, permease protein |
| BruAb1_0973      | 2.64 | down |              | hypothetical protein                                         |
| BruAb1_0993      | 3.00 | down |              | hypothetical protein                                         |
| BruAb1_0819      | 2.83 | down | <i>nuoD</i>  | NADH dehydrogenase subunit D                                 |
| BruAb1_0599      | 2.13 | down |              | peptidoglycan-binding protein                                |
| BruAb1_0804      | 2.92 | down | <i>rpsI</i>  | 30S ribosomal protein S9                                     |
| BruAb1_0164      | 2.30 | down |              | hypothetical protein                                         |
| BruAb2_0881      | 3.37 | down |              | nitrite extrusion protein                                    |
| BruAb1_1243      | 4.96 | down | <i>rpsL</i>  | 30S ribosomal protein S12                                    |
| BruAb1_1240      | 3.71 | down | <i>tuf</i>   | elongation factor Tu                                         |
| BruAb1_0477      | 3.37 | down | <i>rpsF</i>  | 30S ribosomal protein S6                                     |
| BruAb1_1908      | 2.66 | down | <i>dapF</i>  | diaminopimelate epimerase                                    |
| BruAb1_1134      | 2.13 | down | <i>pdhB</i>  | pyruvate dehydrogenase subunit beta                          |

---
